# Supplementary material
Source: HighWire-hosted journal article supplement (http://dmd.aspetjournals.org/highwire/filestream/68407/field_highwire_adjunct_files/0/Supplemental_73866.pdf)
Supplement: Supplemental_73866.pdf [file Supplemental_73866.pdf]

**Supplementary materials**

Journal: Drug Metabolism and Disposition

Title of Article:

Hepatic dipeptidyl peptidase-4 controls pharmacokinetics of vildagliptin *in vivo*

Author's names:

Mitsutoshi Asakura, Tatsuki Fukami, Miki Nakajima, Hideaki Fujii, Koichiro Atsuda, Tomoo Itoh and Ryoichi Fujiwara

**Supplemental Table 1. Characteristics of 23 donors used in this study.**

| Sample No. | Sex | Age (years) | Ethnic    |
|------------|-----|-------------|-----------|
| 1          | M   | 46          | Caucasian |
| 2          | F   | 32          | Hispanic  |
| 3          | F   | 47          | Caucasian |
| 4          | M   | 36          | Caucasian |
| 5          | M   | 38          | Caucasian |
| 6          | F   | 35          | Hispanic  |
| 7          | M   | 52          | Caucasian |
| 8          | M   | 56          | Caucasian |
| 9          | M   | 33          | Caucasian |
| 10         | M   | 49          | Hispanic  |
| 11         | M   | 68          | Caucasian |
| 12         | M   | 60          | Hispanic  |
| 13         | F   | 52          | Black     |
| 14         | M   | 62          | Black     |
| 15         | M   | 16          | Caucasian |
| 16         | F   | 41          | Caucasian |
| 17         | M   | 47          | Caucasian |
| 18         | F   | 47          | Caucasian |
| 19         | M   | 51          | Caucasian |
| 20         | F   | 33          | Hispanic  |
| 21         | M   | 53          | Caucasian |
| 22         | M   | 63          | Caucasian |
| 23         | F   | 33          | Caucasian |

M, Male; F, Female

**Supplemental Table 2. Primer sequences used for real-time RT-PCR analyses.**

| Target         | Forward primers (5' to 3') | Reverse primers (5' to 3') |
|----------------|----------------------------|----------------------------|
| Dpp-4          | CAGCTCATCCTCTAGTGCGG       | AGGTGAAGTGAGGTTCTGCG       |
| Foxa2          | ATGCACTCGGCTTCCAGTAT       | TCATTCCAGCGCCCACATAG       |
| Col1a1         | GAGAGGTGAACAAGGTCCCG       | AAACCTCTCTCGCCTCTTGC       |
| Fabp4          | TTCCTTCAAACCTGGGCGTGG      | TTCCATCCCACCTTCTGCACC      |
| Adipoq         | AGCCGCTTATGTGTATCGCT       | GAGTCCCGGAATGTTGCAGT       |
| Hnf-1 $\alpha$ | CCACCCTGGTTATCGGTCTG       | TGTGGCTGTATAAGGCGTGG       |
| Fabp1          | GAAGGACATCAAGGGGGTGT       | ACTGCCTTGACTTTTTCCCA       |
| Cyclophilin*   | CAGACGCCACTGTCGCTTT        | TGTCTTTGGAACCTTGTCTGCAA    |

\* Fujiwara R, Chen S, Karin M, and Tukey RH (2012) Reduced expression of UGT1A1 in intestines of humanized UGT1 mice via inactivation of NF- $\kappa$ B leads to hyperbilirubinemia. *Gastroenterology* **142**:109–118.

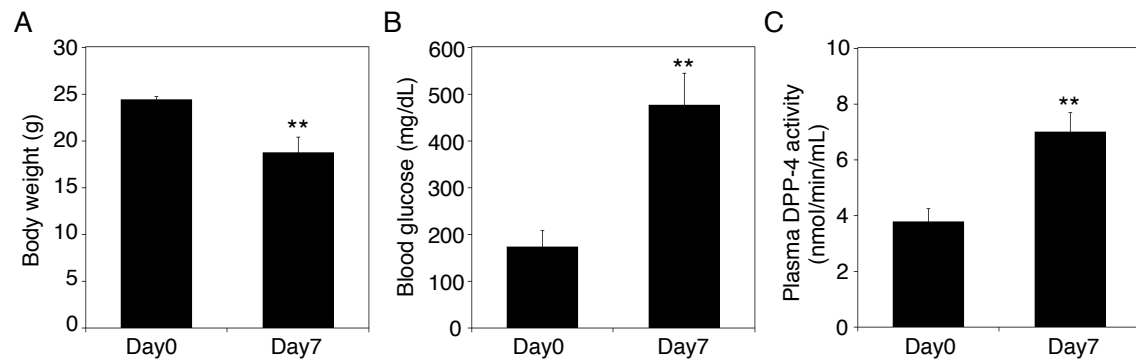

**Supplemental Figure 1. Body weight (A), blood glucose (B), and plasma DPP-4 activity (C) in STZ-induced diabetic mice.** These data were measured at 0 and 7 days after the STZ injection. Plasma glucose concentrations were measured using the glucose CII-test Wako kit (Wako). Plasma DPP-4 activity was measured using Gly-Pro-AMC as a substrate. Data represent the means  $\pm$  S.D. (n = 3). \*\*P < 0.01.

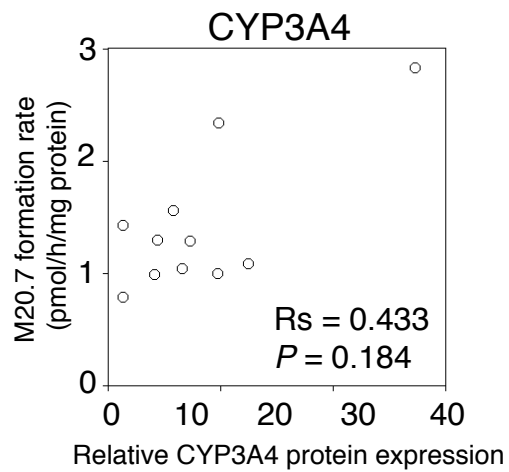

**Supplemental Figure 2. Correlation analysis between hepatic vildagliptin-hydrolyzing activities and protein expression levels of CYP3A4 in individual HLMs.** The relationships between hepatic vildagliptin-hydrolyzing activities and protein expression levels of CYP3A4 of individual HLMs are shown. The correlation analysis was performed using the Spearman rank method. Data represent the means of triplicate determinations.
